# Supplementary material for: Hydrogen bonding in alcohol–ethylene oxide and alcohol–ethylene sulfide complexes
Source: Royal Society of Chemistry journal article supplement (doi:10.1039/c6ra16205c), 2016-01-01
Supplement: c6ra16205c1.pdf [file c6ra16205c1.pdf]

## **Electronic supplementary material**

# **Hydrogen Bonding in the Alcohol–Ethylene Oxide and Alcohol–Ethylene Sulfide Complexes**

Shanshan Tang, Hailiang Zhao, Lin Du\*

Environment Research Institute, Shandong University, Shanda South Road 27, 250100 Shandong,  
China

e-mail: lindu@sdu.edu.cn

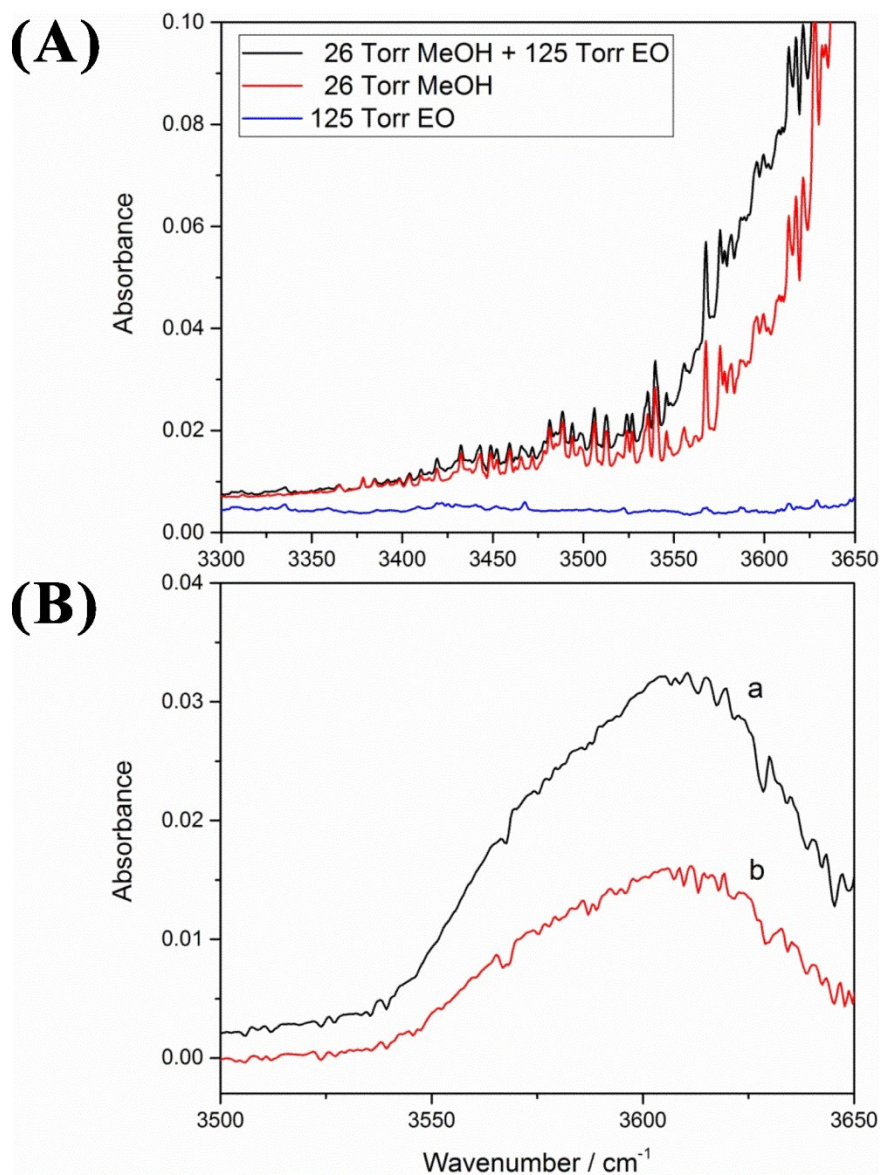

**Figure S1.** (A) Spectra of MeOH, EO, and their mixture in the 3300-3650 cm<sup>-1</sup> region. A 20 cm path length cell was used. (B) Spectra of the MeOH-EO complex in the  $\nu_{OH}^9$  band region. (a) 26 Torr MeOH + 125 Torr EO; (b) 20 Torr MeOH + 90 Torr EO.

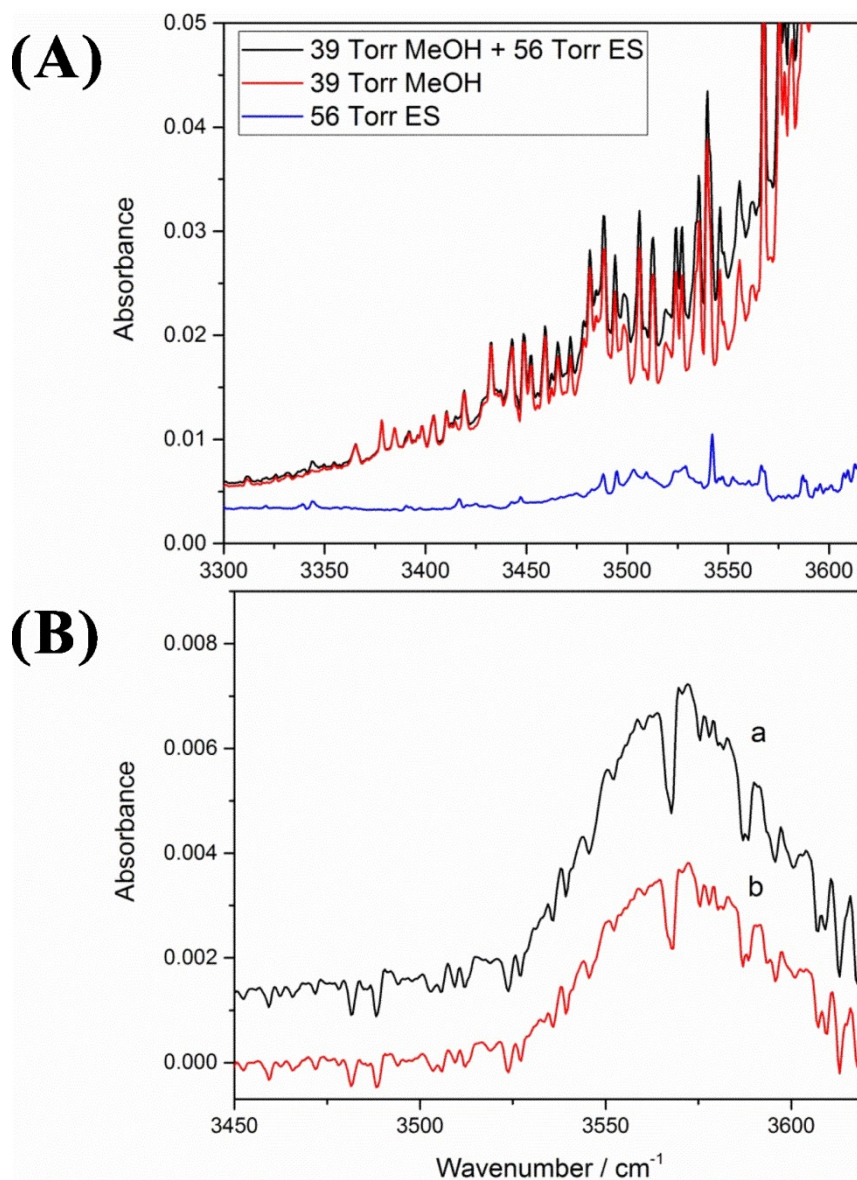

**Figure S2.** (A) Spectra of MeOH, ES, and their mixture in the 3300-3620  $\text{cm}^{-1}$  region. A 20 cm path length cell was used. (B) Spectra of the MeOH-ES complex in the  $\nu_{OH}$  band region. (a) 39 Torr MeOH + 56 Torr ES; (b) 30 Torr MeOH + 49 Torr ES.

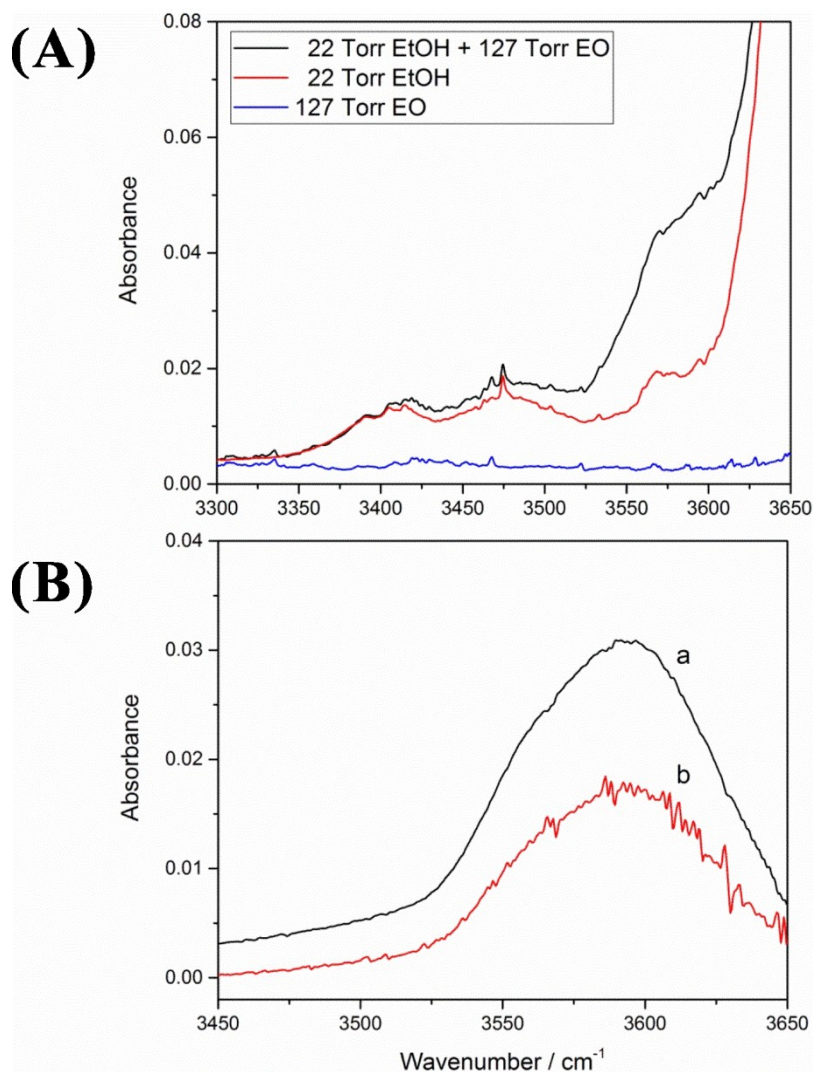

**Figure S3.** (A) Spectra of EtOH, EO, and their mixture in the 3300-3650  $\text{cm}^{-1}$  region. A 20 cm path length cell was used. (B) Spectra of the EtOH-EO complex in the  $\nu_{OH}$  band region. (a) 22 Torr EtOH + 127 Torr EO; (b) 18 Torr EtOH + 93 Torr EO.

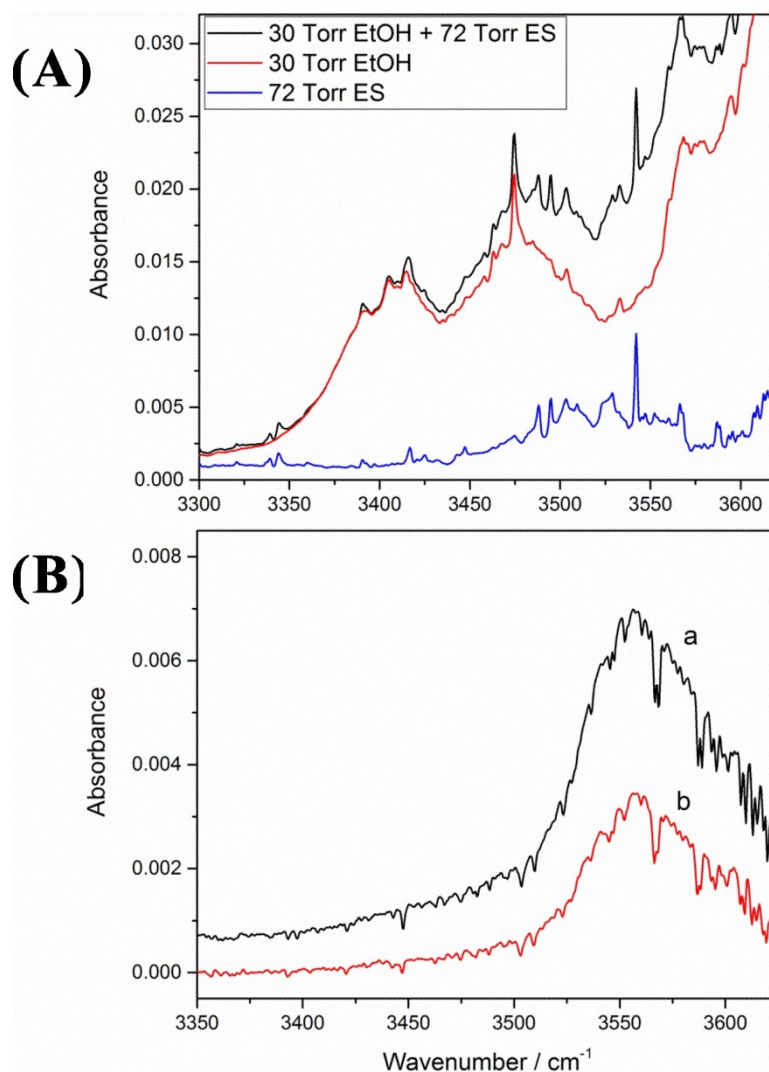

**Figure S4.** (A) Spectra of EtOH, ES, and their mixture in the 3300-3620  $\text{cm}^{-1}$  region. A 20 cm path length cell was used. (B) Spectra of the EtOH-ES complex in the  $\nu_{OH}$  band region. (a) 30 Torr EtOH + 72 Torr ES; (b) 21 Torr EtOH + 54 Torr ES.

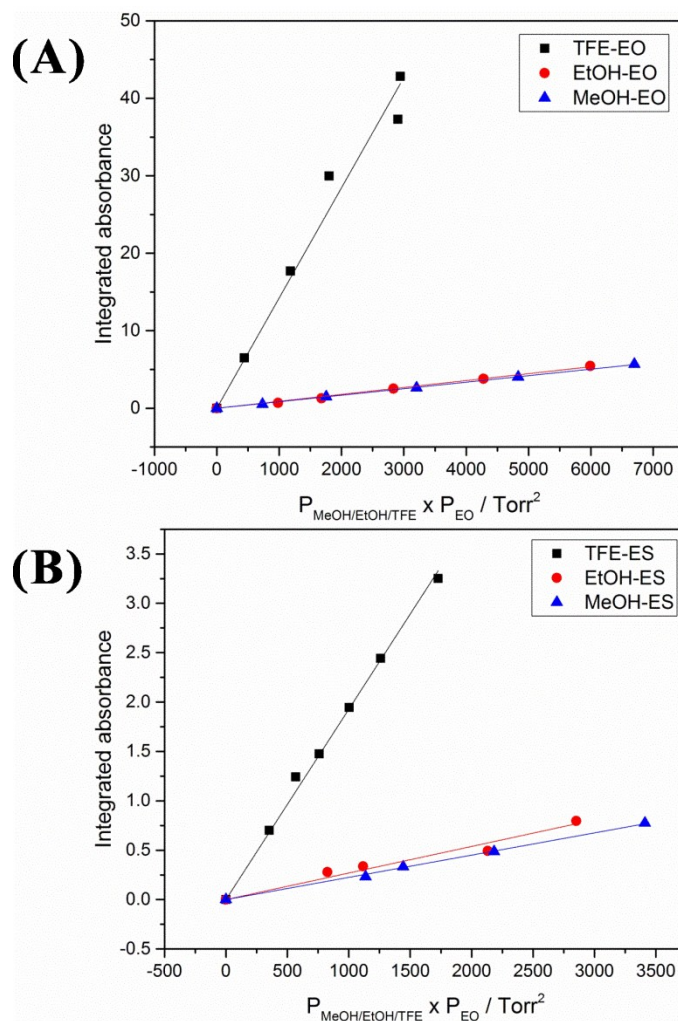

**Figure S5.** (A) The integrated absorbance of the OH-stretching band in the MeOH-EO, EtOH-EO and TFE-EO complexes as a function of the product of the MeOH/EtOH/TFE and EO pressures. A 20 cm path length cell was used. The integration regions for MeOH-EO, EtOH-EO and TFE-EO are 3398-3674, 3397-3658 and 3219-3659  $\text{cm}^{-1}$ , respectively; (B) The integrated absorbance of the OH-stretching band in the MeOH-ES, EtOH-ES and TFE-ES complexes as a function of the product of the MeOH/EtOH/TFE and ES pressures. A 20 cm path length cell was used. The integration regions for MeOH-ES, EtOH-ES and TFE-ES are 3420-3628, 3371-3629 and 3259-3626  $\text{cm}^{-1}$ , respectively.

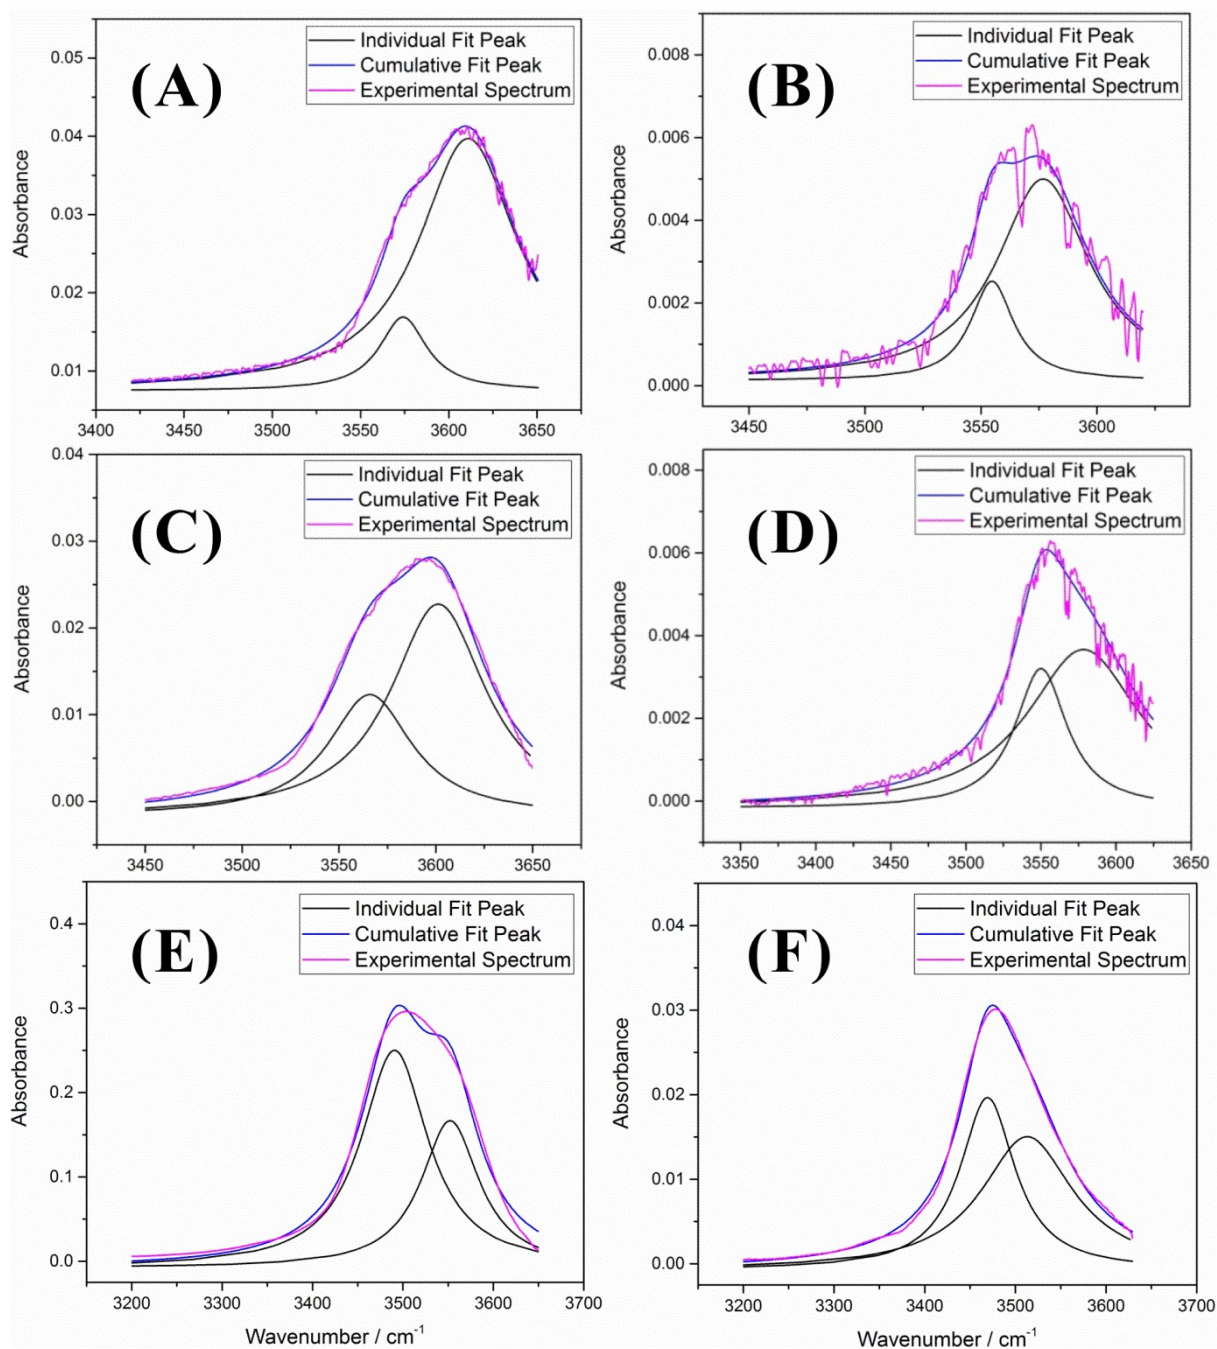

**Figure S6.** The deconvolution fittings of the OH-stretching fundamental transition bands of MeOH-EO (a), MeOH-ES (b), EtOH-EO (c), EtOH-ES (d), TFE-EO (e) and TFE-ES (f)

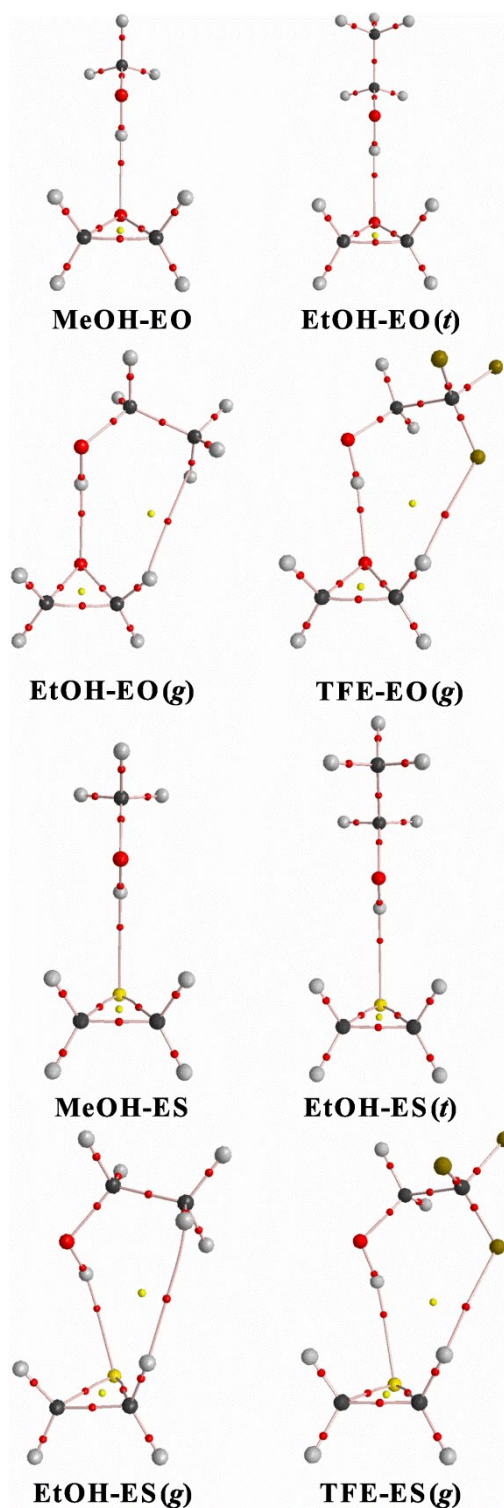

**Figure S7.** AIM plots of the complexes obtained with the B3LYP-D3 method. The bond critical points and ring critical points are presented by the red and yellow balls, respectively.



**Table S1.** Selected optimized geometric parameters in the complexes (angles in degrees and bond lengths in Å)

| Conformer            | Method <sup>a</sup> | $r_{(\text{OH})}$ <sup>b</sup> | $\Delta r_{(\text{OH})}$ <sup>c</sup> | $r_{(\text{HB})}$ <sup>d</sup> | $\theta_{(\text{HB})}$ <sup>e</sup> |
|----------------------|---------------------|--------------------------------|---------------------------------------|--------------------------------|-------------------------------------|
| MeOH-EO              | B3LYP               | 0.9693                         | 0.0086                                | 1.9205                         | 161.6                               |
|                      | $\omega$ B97X-D     | 0.9654                         | 0.0092                                | 1.9069                         | 156.9                               |
| EtOH-EO ( <i>t</i> ) | B3LYP               | 0.9695                         | 0.0084                                | 1.9278                         | 161.3                               |
|                      | $\omega$ B97X-D     | 0.9655                         | 0.0090                                | 1.9119                         | 156.3                               |
| EtOH-EO ( <i>g</i> ) | B3LYP               | 0.9699                         | 0.0080                                | 1.9357                         | 160.3                               |
|                      | $\omega$ B97X-D     | 0.9660                         | 0.0085                                | 1.9211                         | 158.3                               |
| TFE-EO ( <i>g</i> )  | B3LYP               | 0.9750                         | 0.0121                                | 1.8294                         | 172.9                               |
|                      | $\omega$ B97X-D     | 0.9716                         | 0.0132                                | 1.8093                         | 164.8                               |
| MeOH-ES              | B3LYP               | 0.9692                         | 0.0085                                | 2.4401                         | 151.5                               |
|                      | $\omega$ B97X-D     | 0.9647                         | 0.0085                                | 2.4172                         | 149.8                               |
| EtOH-ES ( <i>t</i> ) | B3LYP               | 0.9693                         | 0.0082                                | 2.4515                         | 151.1                               |
|                      | $\omega$ B97X-D     | 0.9646                         | 0.0081                                | 2.4326                         | 147.7                               |
| EtOH-ES ( <i>g</i> ) | B3LYP               | 0.9696                         | 0.0077                                | 2.4676                         | 149.5                               |
|                      | $\omega$ B97X-D     | 0.9655                         | 0.0080                                | 2.4261                         | 152.2                               |
| TFE-ES ( <i>g</i> )  | B3LYP               | 0.9747                         | 0.0118                                | 2.3456                         | 168.0                               |
|                      | $\omega$ B97X-D     | 0.9707                         | 0.0123                                | 2.3128                         | 156.3                               |

<sup>a</sup> aug-cc-pV(T+d)Z basis set for S and aug-cc-pVTZ basis set for the remaining atoms. <sup>b</sup> OH bond length. <sup>c</sup>  $\Delta r_{(\text{OH})} = r_{\text{complex}} - r_{\text{alcohol}}$ , is the change in the OH bond length upon complexation. <sup>d</sup> Intermolecular hydrogen bond distance. <sup>e</sup> Intermolecular hydrogen bond angle, i.e.,  $\theta_{(\text{O}-\text{H}\cdots\text{O})}$  and  $\theta_{(\text{O}-\text{H}\cdots\text{S})}$ .

**Table S2.** Calculated binding energy ( $BE$ ), enthalpy of formation ( $\Delta H_{298K}^\theta$ ), Gibbs free energy of formation ( $\Delta G_{\text{calc}}^\theta$ ) and equilibrium constant ( $K_{\text{eq}}^{\text{calc}}$ ) at 298 K for the complexes

| Conformer            | Method <sup>a</sup> | $BE$ <sup>b</sup> | ZPVE | BSSE | $\Delta H_{\text{calc}}^\theta$ | $\Delta G_{\text{calc}}^\theta$ | $K_{\text{eq}}^{\text{calc}}$ |
|----------------------|---------------------|-------------------|------|------|---------------------------------|---------------------------------|-------------------------------|
| MeOH–EO              | B3LYP               | -14.5             | 5.1  | 0.4  | -13.6                           | 16.8                            | $1.2 \times 10^{-3}$          |
|                      | $\omega$ B97X-D     | -19.3             | 5.5  | 0.6  | -18.8                           | 13.0                            | $5.2 \times 10^{-3}$          |
| EtOH–EO ( <i>t</i> ) | B3LYP               | -14.4             | 4.6  | 0.4  | -13.1                           | 17.4                            | $9.0 \times 10^{-4}$          |
|                      | $\omega$ B97X-D     | -19.3             | 5.2  | 0.6  | -18.6                           | 14.9                            | $2.4 \times 10^{-3}$          |
| EtOH–EO ( <i>g</i> ) | B3LYP               | -14.1             | 4.8  | 0.4  | -12.8                           | 17.9                            | $7.3 \times 10^{-4}$          |
|                      | $\omega$ B97X-D     | -19.9             | 6.3  | 0.7  | -19.9                           | 18.6                            | $5.4 \times 10^{-4}$          |
| TFE–EO ( <i>g</i> )  | B3LYP               | -21.1             | 4.7  | 0.7  | -20.2                           | 14.7                            | $2.7 \times 10^{-3}$          |
|                      | $\omega$ B97X-D     | -27.3             | 5.3  | 1.2  | -27.2                           | 10.2                            | $1.6 \times 10^{-2}$          |
| MeOH–ES              | B3LYP               | -12.3             | 3.9  | 0.4  | -10.9                           | 18.8                            | $5.1 \times 10^{-4}$          |
|                      | $\omega$ B97X-D     | -18.5             | 4.7  | 0.5  | -17.8                           | 16.8                            | $1.1 \times 10^{-3}$          |
| EtOH–ES ( <i>t</i> ) | B3LYP               | -12.1             | 3.5  | 0.5  | -10.4                           | 19.4                            | $4.0 \times 10^{-4}$          |
|                      | $\omega$ B97X-D     | -18.9             | 4.5  | 0.5  | -18.0                           | 18.1                            | $6.6 \times 10^{-4}$          |
| EtOH–ES ( <i>g</i> ) | B3LYP               | -11.8             | 3.6  | 0.4  | -10.1                           | 20.5                            | $2.6 \times 10^{-4}$          |
|                      | $\omega$ B97X-D     | -19.8             | 5.1  | 0.6  | -19.3                           | 19.4                            | $4.1 \times 10^{-4}$          |
| TFE–ES ( <i>g</i> )  | B3LYP               | -16.8             | 3.2  | 0.7  | -15.4                           | 18.5                            | $5.7 \times 10^{-4}$          |
|                      | $\omega$ B97X-D     | -25.0             | 3.9  | 1.1  | -24.4                           | 13.6                            | $4.1 \times 10^{-3}$          |

<sup>a</sup> aug-cc-pV(T+d)Z basis set for S and aug-cc-pVTZ basis set for the remaining atoms. Energies are in  $\text{kJ mol}^{-1}$ . <sup>b</sup>  $BE$  corrected with ZPVE and BSSE.

**Table S3.** Calculated harmonic OH-stretching wavenumbers and oscillator strengths <sup>a</sup>

| Conformer   |                                               | B3LYP                | $\omega$ B97X-D      |
|-------------|-----------------------------------------------|----------------------|----------------------|
| MeOH        | $\nu_{\text{OH}} / \text{cm}^{-1}$            | 3829                 | 3918                 |
|             | $f_{\text{MeOH}}$                             | $5.8 \times 10^{-6}$ | $6.4 \times 10^{-6}$ |
| EtOH (t)    | $\nu_{\text{OH}} / \text{cm}^{-1}$            | 3825                 | 3914                 |
|             | $f_{\text{EtOH}(t)}$                          | $5.4 \times 10^{-6}$ | $6.0 \times 10^{-6}$ |
| EtOH (g)    | $\nu_{\text{OH}} / \text{cm}^{-1}$            | 3810                 | 3896                 |
|             | $f_{\text{EtOH}(g)}$                          | $4.2 \times 10^{-6}$ | $4.6 \times 10^{-6}$ |
| TFE (g)     | $\nu_{\text{OH}} / \text{cm}^{-1}$            | 3806                 | 3892                 |
|             | $f_{\text{TFE}(g)}$                           | $9.2 \times 10^{-6}$ | $9.5 \times 10^{-6}$ |
| MeOH-EO     | $\nu_{\text{OH}} / \text{cm}^{-1}$            | 3656                 | 3737                 |
|             | $\Delta \nu_{\text{OH}} / \text{cm}^{-1}{}^b$ | 173                  | 181                  |
|             | $f$                                           | $9.5 \times 10^{-5}$ | $8.7 \times 10^{-5}$ |
|             | $ff_{\text{MeOH}}$                            | 16.4                 | 13.6                 |
| EtOH-EO (t) | $\nu_{\text{OH}} / \text{cm}^{-1}$            | 3655                 | 3736                 |
|             | $\Delta \nu_{\text{OH}} / \text{cm}^{-1}{}^b$ | 170                  | 178                  |
|             | $f$                                           | $1.0 \times 10^{-4}$ | $9.1 \times 10^{-5}$ |
|             | $ff_{\text{EtOH}(t)}$                         | 18.6                 | 15.1                 |
| EtOH-EO (g) | $\nu_{\text{OH}} / \text{cm}^{-1}$            | 3649                 | 3733                 |
|             | $\Delta \nu_{\text{OH}} / \text{cm}^{-1}{}^b$ | 161                  | 163                  |
|             | $f$                                           | $8.6 \times 10^{-5}$ | $6.9 \times 10^{-5}$ |
|             | $ff_{\text{EtOH}(g)}$                         | 20.2                 | 15.0                 |
| TFE-EO (g)  | $\nu_{\text{OH}} / \text{cm}^{-1}$            | 3553                 | 3621                 |
|             | $\Delta \nu_{\text{OH}} / \text{cm}^{-1}{}^b$ | 253                  | 271                  |
|             | $f$                                           | $1.5 \times 10^{-4}$ | $1.4 \times 10^{-4}$ |
|             | $ff_{\text{TFE}(g)}$                          | 16.5                 | 14.3                 |
| MeOH-ES     | $\nu_{\text{OH}} / \text{cm}^{-1}$            | 3651                 | 3749                 |
|             | $\Delta \nu_{\text{OH}} / \text{cm}^{-1}{}^b$ | 177                  | 169                  |
|             | $f$                                           | $8.0 \times 10^{-5}$ | $6.1 \times 10^{-5}$ |
|             | $ff_{\text{MeOH}}$                            | 13.7                 | 9.5                  |
| EtOH-ES (t) | $\nu_{\text{OH}} / \text{cm}^{-1}$            | 3654                 | 3752                 |
|             | $\Delta \nu_{\text{OH}} / \text{cm}^{-1}{}^b$ | 171                  | 162                  |
|             | $f$                                           | $8.2 \times 10^{-5}$ | $5.9 \times 10^{-5}$ |
|             | $ff_{\text{EtOH}(t)}$                         | 15.2                 | 9.8                  |
| EtOH-ES (g) | $\nu_{\text{OH}} / \text{cm}^{-1}$            | 3650                 | 3736                 |
|             | $\Delta \nu_{\text{OH}} / \text{cm}^{-1}{}^b$ | 160                  | 161                  |
|             | $f$                                           | $7.0 \times 10^{-5}$ | $5.9 \times 10^{-5}$ |
|             | $ff_{\text{TFE}(g)}$                          | 16.5                 | 12.7                 |
| TFE-ES (g)  | $\nu_{\text{OH}} / \text{cm}^{-1}$            | 3547                 | 3632                 |
|             | $\Delta \nu_{\text{OH}} / \text{cm}^{-1}{}^b$ | 259                  | 259                  |
|             | $f$                                           | $1.5 \times 10^{-4}$ | $1.2 \times 10^{-4}$ |
|             | $ff_{\text{TFE}(g)}$                          | 16.1                 | 12.6                 |

<sup>a</sup> aug-cc-pV(T+d)Z basis set for S and aug-cc-pVTZ basis set for all the remaining atoms. <sup>b</sup>  $\Delta \nu_{\text{OH}} = \nu_{\text{alcohol}} - \nu_{\text{complex}}$ .

**Table S4.** AIM parameters for the complexes (all values in a.u.) <sup>a</sup>

|                 | Conformer            |                | $\Delta q(\text{H})$ | $\Delta E(\text{H})$ | $\rho(\text{BCP})$ | $\nabla^2\rho(\text{BCP})$ |
|-----------------|----------------------|----------------|----------------------|----------------------|--------------------|----------------------------|
| B3LYP           | MeOH–EO              | O–H $\cdots$ O | 0.0365               | 0.0213               | 0.0278             | 0.0845                     |
|                 | EtOH–EO ( <i>t</i> ) | O–H $\cdots$ O | 0.0363               | 0.0203               | 0.0273             | 0.0838                     |
|                 | EtOH–EO ( <i>g</i> ) | O–H $\cdots$ O | 0.0398               | 0.0222               | 0.0268             | 0.0831                     |
|                 | TFE–EO ( <i>g</i> )  | O–H $\cdots$ O | 0.0375               | 0.0240               | 0.0340             | 0.0908                     |
|                 | MeOH–ES              | O–H $\cdots$ S | 0.0043               | 0.0114               | 0.0186             | 0.0404                     |
|                 | EtOH–ES ( <i>t</i> ) | O–H $\cdots$ S | 0.0095               | 0.0149               | 0.0182             | 0.0400                     |
|                 | EtOH–ES ( <i>g</i> ) | O–H $\cdots$ S | 0.0119               | 0.0159               | 0.0176             | 0.0393                     |
|                 | TFE–ES ( <i>g</i> )  | O–H $\cdots$ S | -0.0035              | 0.0097               | 0.0231             | 0.0417                     |
| $\omega$ B97X-D | MeOH–EO              | O–H $\cdots$ O | 0.0399               | 0.0228               | 0.0288             | 0.0882                     |
|                 | EtOH–EO ( <i>t</i> ) | O–H $\cdots$ O | 0.0328               | 0.0207               | 0.0285             | 0.0879                     |
|                 | EtOH–EO ( <i>g</i> ) | O–H $\cdots$ O | 0.0416               | 0.0259               | 0.0281             | 0.0862                     |
|                 | TFE–EO ( <i>g</i> )  | O–H $\cdots$ O | 0.0457               | 0.0326               | 0.0362             | 0.0954                     |
|                 | MeOH–ES              | O–H $\cdots$ S | 0.0136               | 0.0151               | 0.0195             | 0.0433                     |
|                 | EtOH–ES ( <i>t</i> ) | O–H $\cdots$ S | 0.0065               | 0.0135               | 0.0189             | 0.0429                     |
|                 | EtOH–ES ( <i>g</i> ) | O–H $\cdots$ S | 0.0120               | 0.0166               | 0.0190             | 0.0424                     |
|                 | TFE–ES ( <i>g</i> )  | O–H $\cdots$ S | 0.0118               | 0.0224               | 0.0242             | 0.0459                     |

<sup>a</sup> aug-cc-pV(T+d)Z basis set for S and aug-cc-pVTZ basis set for all the remaining atoms. All values are in a.u.

**Table S5.** NBO parameters for the alcohol–EO complexes at the B3LYP/aug-cc-pVTZ level <sup>a</sup>

| NBO parameters                                                         | MeOH–EO      | EtOH–EO ( <i>t</i> ) | EtOH–EO ( <i>g</i> ) | TFE–EO ( <i>g</i> ) |
|------------------------------------------------------------------------|--------------|----------------------|----------------------|---------------------|
| $\Delta q(\text{H})$                                                   | 0.02422      | 0.01856              | 0.01999              | 0.02087             |
| $\Delta q(\text{O})$                                                   | -0.02531     | -0.02428             | -0.02495             | -0.03562            |
| $\delta(n_{\text{O}})$                                                 | 1.986, 1.921 | 1.986, 1.921         | 1.986, 1.921         | 1.984, 1.919        |
| $\delta(\sigma^*_{\text{O-H}})$                                        | 0.0233       | 0.0221               | 0.0239               | 0.0310              |
| $E_{i \rightarrow j^*}^{(2)}$                                          | 31.76        | 31.00                | 30.34                | 48.87               |
|                                                                        | (6.78+24.98) | (6.57+24.43)         | (6.49+23.85)         | (12.80+36.07)       |
| $\varepsilon_{j^*}^{(0)} - \varepsilon_i^{(0)}$                        | 2.01         | 2.02                 | 2.01                 | 1.98                |
|                                                                        | (1.22+0.79)  | (1.23+0.79)          | (1.22+0.79)          | (1.19+0.79)         |
|                                                                        | 0.102        | 0.101                | 0.100                | 0.129               |
| $\langle \varphi_i^{(0)}   \hat{F}_{KS}   \varphi_{j^*}^{(0)} \rangle$ | (0.04+0.062) | (0.039+0.062)        | (0.039+0.061)        | (0.054+0.075)       |

<sup>a</sup> The values in the parentheses give the individual contribution of the nonbonding orbitals of oxygen. The  $\delta(n_{\text{pO}})$  values are for each of the two lone pairs.  $E_{i \rightarrow j^*}^{(2)}$  is in kJ mol<sup>-1</sup>, all other values are in a.u.

**Table S6.** NBO parameters for the alcohol–EO complexes at the  $\omega$ B97X-D/aug-cc-pVTZ level <sup>a</sup>

| NBO parameters                                                               | MeOH–EO                | EtOH–EO ( <i>t</i> )   | EtOH–EO ( <i>g</i> )   | TFE–EO ( <i>g</i> )    |
|------------------------------------------------------------------------------|------------------------|------------------------|------------------------|------------------------|
| $\Delta q(\text{H})$                                                         | 0.02305                | 0.01775                | 0.01861                | 0.01803                |
| $\Delta q(\text{O})$                                                         | -0.02592               | -0.02515               | -0.02533               | -0.02967               |
| $\delta(n_{\text{O}})$                                                       | 1.987, 1.920           | 1.987, 1.920           | 1.987, 1.920           | 1.984, 1.916           |
| $\delta(\sigma^*_{\text{O-H}})$                                              | 0.0232                 | 0.0223                 | 0.0240                 | 0.0327                 |
| $E_{i \rightarrow j^*}^{(2)}$                                                | 39.46<br>(7.49+31.97)  | 38.83<br>(7.32+31.51)  | 38.29<br>(7.45+30.84)  | 63.51<br>(13.01+50.50) |
| $\epsilon_{j^*}^{(0)} - \epsilon_i^{(0)}$                                    | 2.35<br>(1.39+0.96)    | 2.36<br>(1.40+0.96)    | 2.35<br>(1.39+0.96)    | 2.31<br>(1.36+0.95)    |
| $\langle \hat{\varphi}_i^{(0)}   F_{KS}   \hat{\varphi}_{j^*}^{(0)} \rangle$ | 0.123<br>(0.045+0.078) | 0.121<br>(0.044+0.077) | 0.121<br>(0.045+0.076) | 0.155<br>(0.058+0.097) |

<sup>a</sup> The values in the parentheses give the individual contribution of the nonbonding orbitals of oxygen. The  $\delta(n_{\text{pO}})$  values are for each of the two lone pairs.  $E_{i \rightarrow j^*}^{(2)}$  is in kJ mol<sup>-1</sup>, all other values are in a.u.

**Table S7.** NBO parameters for the alcohol–ES complexes at the B3LYP/aug-cc-pVTZ level <sup>a</sup> ( $E_{i \rightarrow j^*}^{(2)}$  is in kJ mol<sup>-1</sup>, all other values are in a.u.)

| NBO parameters                                                               | MeOH–ES                | EtOH–ES ( <i>t</i> )   | EtOH–ES ( <i>g</i> )   | TFE–ES ( <i>g</i> )    |
|------------------------------------------------------------------------------|------------------------|------------------------|------------------------|------------------------|
| $\Delta q(\text{H})$                                                         | 0.00780                | 0.00669                | 0.00826                | 0.00371                |
| $\Delta q(\text{S})$                                                         | -0.02145               | -0.02137               | -0.02293               | -0.01486               |
| $\delta(n_{\text{S}})$                                                       | 1.996, 1.923           | 1.996, 1.924           | 1.996, 1.925           | 1.994, 1.911           |
| $\delta(\sigma^*_{\text{O-H}})$                                              | 0.0286                 | 0.0265                 | 0.0280                 | 0.0432                 |
| $E_{i \rightarrow j^*}^{(2)}$                                                | 27.95<br>(1.63+26.32)  | 26.31<br>(1.42+24.89)  | 25.11<br>(1.51+23.60)  | 47.41<br>(3.31+44.10)  |
| $\epsilon_{j^*}^{(0)} - \epsilon_i^{(0)}$                                    | 1.83<br>(1.14+0.69)    | 1.84<br>(1.14+0.70)    | 1.83<br>(1.14+0.69)    | 1.80<br>(1.12+0.68)    |
| $\langle \hat{\varphi}_i^{(0)}   F_{KS}   \hat{\varphi}_{j^*}^{(0)} \rangle$ | 0.037<br>(0.019+0.060) | 0.076<br>(0.018+0.058) | 0.074<br>(0.018+0.056) | 0.104<br>(0.027+0.077) |

<sup>a</sup> The values in the parentheses give the individual contribution of the nonbonding orbitals of oxygen. The  $\delta(n_{\text{pO}})$  values are for each of the two lone pairs.  $E_{i \rightarrow j^*}^{(2)}$  is in kJ mol<sup>-1</sup>, all other values are in a.u.

**Table S8.** NBO parameters for the alcohol–ES complexes at the  $\omega$ B97X-D/aug-cc-pVTZ level <sup>a</sup> ( $E_{i \rightarrow j}^{(2)}$  is in kJ mol<sup>-1</sup>, all other values are in a.u.)

| NBO parameters                                                                     | MeOH–ES       | EtOH–ES ( <i>t</i> ) | EtOH–ES ( <i>g</i> ) | TFE–ES ( <i>g</i> ) |
|------------------------------------------------------------------------------------|---------------|----------------------|----------------------|---------------------|
| $\Delta q(\text{H})$                                                               | 0.00822       | 0.00777              | 0.00879              | 0.00453             |
| $\Delta q(\text{S})$                                                               | -0.02106      | -0.02133             | -0.02229             | -0.01645            |
| $\delta(n_{\text{S}})$                                                             | 1.996, 1.926  | 1.996, 1.927         | 1.995, 1.926         | 1.995, 1.913        |
| $\delta(\sigma_{\text{O-H}}^*)$                                                    | 0.0270        | 0.0246               | 0.0280               | 0.0414              |
| $E_{i \rightarrow j}^{(2)}$                                                        | 35.61         | 32.71                | 35.02                | 60.42               |
|                                                                                    | (2.22+33.39)  | (1.92+30.79)         | (2.26+32.76)         | (3.81+56.61)        |
| $\varepsilon_{j^*}^{(0)} - \varepsilon_i^{(0)}$                                    | 2.17          | 2.18                 | 2.17                 | 2.12                |
|                                                                                    | (1.31+0.86)   | (1.32+0.86)          | (1.31+0.86)          | (1.28+0.84)         |
| $\langle \hat{\varphi}_i^{(0)}   \hat{F}_{KS}   \hat{\varphi}_{j^*}^{(0)} \rangle$ | 0.099         | 0.094                | 0.098                | 0.127               |
|                                                                                    | (0.024+0.075) | (0.022+0.072)        | (0.024+0.074)        | (0.031+0.096)       |

<sup>a</sup> The values in the parentheses give the individual contribution of the nonbonding orbitals of oxygen. The  $\delta(n_{\text{pO}})$  values are for each of the two lone pairs.  $E_{i \rightarrow j}^{(2)}$  is in kJ mol<sup>-1</sup>, all other values are in a.u.
